# Supplementary material
Source: publisher figshare collection journal article supplement (https://acs.figshare.com/ndownloader/files/3758395)
Supplement: Supplementary file 1 [file 3758395]

## Supporting Information

### Finding the Perfect Match: Halogen versus Hydrogen Bonding

Tanya Shirman,<sup>‡,†</sup> Meital Boterashvili,<sup>‡</sup> Meital Orbach,<sup>‡</sup> Dalia Freeman,<sup>‡</sup> Linda J. W. Shimon,<sup>§</sup>  
Michal Lahav,<sup>‡</sup> and Milko E. van der Boom<sup>\*,‡</sup>

<sup>‡</sup>Department of Organic Chemistry, The Weizmann Institute of Science, 234 Herzl St., Rehovot 7610001, Israel. <sup>§</sup>Department of Chemical Research Support, The Weizmann Institute of Science, 234 Herzl St., Rehovot 7610001, Israel.

#### Materials and methods

All reactions were performed under argon or nitrogen unless otherwise stated. Chemicals were obtained from Aldrich and used as received. The synthesis and characterization of compounds **1** (X = F, Br, I) and **2** (X = F and I) were reported.<sup>1</sup> Reaction flasks were washed with deionized (DI) water, followed by acetone, and then dried in an oven at 130 °C overnight prior to use. The <sup>1</sup>H and <sup>13</sup>C{<sup>1</sup>H} NMR spectra were recorded at 400.19 and 100.6 MHz, respectively, on a Bruker AMX 400 NMR spectrometer. The <sup>19</sup>F{<sup>1</sup>H} NMR spectra were recorded at 356.1 MHz on a Bruker AMX 400 NMR spectrometer. All chemical shifts ( $\delta$ ) are reported in ppm and coupling constants ( $J$ ) are in Hz. The <sup>1</sup>H and <sup>13</sup>C{<sup>1</sup>H} chemical shifts are reported relative to tetramethylsilane (TMS) or to chloroform ( $\delta$  7.24 in <sup>1</sup>H and  $\delta$  77.0 in <sup>13</sup>C{<sup>1</sup>H} NMR). <sup>19</sup>F{<sup>1</sup>H} NMR chemical shifts are relative to hexafluorobenzene in CDCl<sub>3</sub> at  $\delta$  = -163.0 ppm (external reference). Assignments in the <sup>13</sup>C{<sup>1</sup>H} NMR were aided by <sup>13</sup>C-DEPT-135 NMR measurements. All measurements were carried out at 298 K. Mass spectrometry was carried out using a Micromass Platform LCZ 4000 instrument.

**Preparation of 4'-chloro-2',3',5',6'-tetrafluorostilbazole (1Cl).** A mixture of 4-chloro-2,3,5,6-tetrafluorobenzaldehyde (2.43 g, 11.5 mmol) and  $\gamma$ -picoline (1.1 mL, 12 mmol) in 10 mL acetic anhydride was stirred at room temperature for 60 h under argon. The mixture became dark and a precipitate formed during this time period. Subsequently, the mixture was poured into cold water at 0°C and was basified to pH = 8-9 by addition of a 15% aqueous solution of Na<sub>2</sub>CO<sub>3</sub>. The crude product was extracted with

dichloromethane (3 × 50 mL), the combined fractions were dried (Na<sub>2</sub>SO<sub>4</sub>) and filtered. The solution was treated with decolorizing charcoal overnight. Filtration over celite and evaporation of the solvent yielded yellow oil that crystallized upon addition of hexane. This afforded 1.1 g (32%) of light-green crystals suitable for X-ray analysis. Compound **1Cl** partly undergoes a reaction when subjected to column chromatography on silica gel. Signals of undetermined products were observed by <sup>19</sup>F{<sup>1</sup>H} NMR after chromatography. <sup>1</sup>H NMR (CDCl<sub>3</sub>): δ 8.65 (br dd, <sup>3</sup>J<sub>HH</sub> = 5.9 Hz, <sup>4</sup>J<sub>HH</sub> = 1.3 Hz, 2H, PyrH), 7.41 (d, <sup>3</sup>J<sub>HH</sub> = 5.9 Hz, <sup>4</sup>J<sub>HH</sub> = 1.2 Hz, 2H, PyrH), 7.33 (dd, AB, <sup>3</sup>J<sub>HH</sub> = 17.3 Hz, 2H, CH=CH). <sup>13</sup>C{<sup>1</sup>H} NMR (C<sub>6</sub>D<sub>6</sub>): δ 150.2 (s, C-Pyr), 145.8 (m, C<sub>q</sub>, C-F), 145.3 (m, C<sub>q</sub>, C-F), 143.8 (m, C<sub>q</sub>, C-F), 143.3 (m, C<sub>q</sub>, C-F), 142.8 (s, C<sub>q</sub>, C-Pyr), 135.4 (t, <sup>3</sup>J<sub>FC</sub> = 8.3 Hz, CH=CH), 120.8 (s, C-Pyr), 116.7 (s, HC=CH), 114.9 (t, C<sub>q</sub>, <sup>2</sup>J<sub>FC</sub> = 13.0 Hz, C-Cl), 111.3 (m, C<sub>q</sub>, C-Ar<sub>f</sub>). <sup>19</sup>F{<sup>1</sup>H} NMR (CDCl<sub>3</sub>): δ -141.45 (m, 4F). HRMS (FD-TOF): *m/z*: calcd. for C<sub>13</sub>H<sub>6</sub>ClF<sub>4</sub>N 287.0125; found 287.0131. *N*-oxide derivatives, **2Cl** and **2Br**, were prepared according a modified published procedure.<sup>1c</sup>

**2Cl**: <sup>1</sup>H NMR (CDCl<sub>3</sub>): δ 8.32 (br, 2H, PyrNOH), 7.53 (2H, PyrNOH), 7.40 (dd, AB, <sup>3</sup>J<sub>HH</sub> = 94.8 Hz, 2H, CH=CH). <sup>13</sup>C{<sup>1</sup>H} NMR (CDCl<sub>3</sub>): 146.18 (m, C<sub>q</sub>, C-F), 145.51 (m, C<sub>q</sub>, C-F), 143.67 (m, C<sub>q</sub>, C-F), 143.21 (m, C<sub>q</sub>, C-F), 136.24 (s, C<sub>q</sub>, C-PyrNO), 132.12 (CH=CH), 139.65 (s, C-PyrNO), 123.64 (s, C-PyrNO), 118.02 (s, HC=CH), 114.23 (t, C<sub>q</sub>, <sup>2</sup>J<sub>FC</sub> = 13.0 Hz, C-Cl), 112.57 (m, C<sub>q</sub>, C-Ar<sub>f</sub>). <sup>19</sup>F{<sup>1</sup>H} NMR (CDCl<sub>3</sub>): δ -141.8 (br, 4F). HRMS (FD-TOF): *m/z*: calcd. for C<sub>13</sub>H<sub>6</sub>ClF<sub>4</sub>NO: 303.0074; found 303.0081. Crystallization from diethyl-ether at 4°C afforded **2Cl** as yellowish crystals suitable for single-crystal X-ray structure determination.

**2Br**: <sup>1</sup>H NMR (CDCl<sub>3</sub>): δ 8.54 (s, br, 2H, NOH), 7.68 (s, br, 2H, NOH), 7.51 (dd, AB, <sup>3</sup>J<sub>HH</sub> = 69.7 Hz, 2H, CH=CH). <sup>13</sup>C{<sup>1</sup>H} NMR (CDCl<sub>3</sub>): 146.10, 144.65, 139.71, 131.58, 131.42, 125.68, 123.88, 120.33, 114.53. <sup>19</sup>F{<sup>1</sup>H} NMR (CDCl<sub>3</sub>): δ -133.65 (dd, 2F), -140.82 (dd, 2F). HRMS (FD-TOF): *m/z*: calcd. for C<sub>13</sub>H<sub>6</sub>BrF<sub>4</sub>NO: 369.9467; found 369.9464. Crystallization from diethyl ether produced **2Br** as light yellow crystals, suitable for single-crystal X-ray structure determination.

### Crystallization of compounds **1F**, **2F** and **2I**:

**1F**: Colorless crystals of compound **1F** were obtained upon slow evaporation of a chloroform solution at room temperature.

**2F**: Compound **2F** was crystallized from diethyl ether at 4 °C.

**2I**: Recrystallization from ethyl acetate/diisopropyl ether afforded compound **2I** as colorless needles suitable for single-crystal X-ray structure determination.

### X-ray Crystallography.

**1F** *Crystal data*: C<sub>13</sub>H<sub>6</sub>F<sub>5</sub>N, colorless, 0.5 × 0.2 × 0.1 mm<sup>3</sup>, triclinic, space group P-1, a = 5.766(1) Å, b = 9.081(2) Å, c = 10.927(2) Å, α = 70.74(3)°, β = 85.15(3)°, γ = 81.57(3)° from 20 degrees of data, T = 120(2) K, V = 533.9(2) Å<sup>3</sup>, Z = 2, F<sub>w</sub> = 271.19, D<sub>c</sub> = 1.687 Mg·m<sup>-3</sup>, μ = 0.161 mm<sup>-1</sup>. *Data collection and processing*: Nonius KappaCCD diffractometer, MoKα (λ = 0.71073 Å), graphite monochromator, 28897 reflections collected, 4886 independent reflections (R<sub>int</sub> = 0.058). -7 ≤ h ≤ 7, -11 ≤ k ≤ 11, -14 ≤ l ≤ 14, frame scan width = 1.0°, scan speed 1.0° per 85 sec, typical peak mosaicity 0.682°. The data were processed with Denzo-Scalepack. *Solution and refinement*: Structure solved by direct method with SHELXT-2013.<sup>2</sup> Full matrix least-squares refinement based on F<sup>2</sup> with SHELXL-2013.<sup>2</sup> 196 parameters with 0 restraints, final R<sub>1</sub> = 0.0446 (based on F<sup>2</sup>) for data with I > 2σ (I) and R<sub>1</sub> = 0.0636 on 2436 reflections. Goodness of fit on F<sup>2</sup> = 1.024, largest electron density peak = 0.408 e·Å<sup>-3</sup>, deepest hole = -0.253 e·Å<sup>-3</sup>. CCDC 1062744

**1CI** *Crystal data*: C<sub>13</sub>H<sub>6</sub>ClF<sub>4</sub>N, green prisms, 0.5 × 0.3 × 0.3 mm<sup>3</sup>, monoclinic, space group P2<sub>1</sub>/c, a = 9.199(2) Å, b = 10.765(2) Å, c = 11.907(2) Å, β = 108.31(3)°, T = 120(2) K, V = 1119.5(4) Å<sup>3</sup>, Z = 4, F<sub>w</sub> = 287.64, D<sub>c</sub> = 1.707 Mg·m<sup>-3</sup>, μ = 0.378 mm<sup>-1</sup>. *Data collection and processing*: Nonius KappaCCD diffractometer, MoKα (λ = 0.71073 Å), 17248 reflections collected, 2809 independent reflections (R<sub>int</sub> = 0.050). -12 ≤ h ≤ 12, 14 ≤ k ≤ 13, -15 ≤ l ≤ 15, frame scan width = 1.0°, scan speed 1.0° per 60 sec, typical peak mosaicity 0.509°. The data were processed with Denzo-Scalepack. *Solution and refinement*: Structure solved by SHELXT-2013,<sup>2</sup> Full matrix least-squares refinement based on F<sup>2</sup> with SHELXL-2013.<sup>2</sup> 196 parameters with 0 restraints, final R<sub>1</sub> = 0.0367

(based on  $F^2$ ) for data with  $I > 2\sigma(I)$  and  $R_1 = 0.0488$  on 2654 reflections. Goodness of fit on  $F^2 = 1.007$ , largest electron density peak =  $0.384 \text{ e}\cdot\text{\AA}^{-3}$ , deepest hole =  $-0.317 \text{ e}\cdot\text{\AA}^{-3}$ . CCDC 1062743

**2F**  $2\text{C}_{13}\text{H}_6\text{F}_5\text{NO} + \text{H}_2\text{O}$ , colorless chunk,  $0.39 \times 0.23 \times 0.16 \text{ mm}^3$ , tetragonal, space group  $P4_32_12$ ,  $a = b = 6.3949(2) \text{ \AA}$ ,  $c = 57.5399(18) \text{ \AA}$ , from 25 degrees of data,  $T = 100(2) \text{ K}$ ,  $V = 2353.08(13) \text{ \AA}^3$ ,  $Z = 4$ ,  $F_w = 529.39$ ,  $D_c = 1.672 \text{ Mg}\cdot\text{m}^{-3}$ ,  $\mu = 0.163 \text{ mm}^{-1}$ . *Data collection and processing*: Bruker Apex-II diffractometer,  $\text{MoK}\alpha$  ( $\lambda = 0.71073 \text{ \AA}$ ), graphite monochromator,  $-8 \leq h \leq 7$ ,  $-6 \leq k \leq 8$ ,  $-69 \leq l \leq 72$ , frame scan width =  $0.5^\circ$ , scan speed  $1.0^\circ$  per 90 sec, typical peak mosaicity  $0.55^\circ$ , 13648 reflections collected, 2683 independent reflections ( $R_{\text{int}} = 0.0264$ ). The data were processed SAINT. *Solution and refinement*: Structure solved by Bruker AutoSolve and refined with full matrix least-squares refinement based on  $F^2$  with SHELXL-2013.<sup>2</sup> 188 parameters with 0 restraints, final  $R_1 = 0.0430$  (based on  $F^2$ ) for data with  $I > 2\sigma(I)$  and  $R_1 = 0.0477$  on 2683 reflections. Goodness of fit on  $F^2 = 1.135$ , largest electron density peak =  $0.643 \text{ e}\cdot\text{\AA}^{-3}$  and hole =  $-0.376 \text{ e}\cdot\text{\AA}^{-3}$ . CCDC 1062739

**2Cl** *Crystal data*:  $\text{C}_{13}\text{H}_6\text{ClF}_4\text{NO}$ , colorless plates,  $0.18 \times 0.18 \times 0.04 \text{ mm}^3$ , monoclinic, space group  $P2_1/c$ ,  $a = 10.0782(3) \text{ \AA}$ ,  $b = 12.6478(4) \text{ \AA}$ ,  $c = 9.6673(3) \text{ \AA}$ ,  $\alpha = 90^\circ$ ,  $\beta = 108.784(1)^\circ$ ,  $\gamma = 90^\circ$ , from 18 degrees of data,  $T = 120(2) \text{ K}$ ,  $V = 1166.63(6) \text{ \AA}^3$ ,  $Z = 4$ ,  $F_w = 303.64$ ,  $D_c = 1.729 \text{ Mg}\cdot\text{m}^{-3}$ ,  $\mu = 0.374 \text{ mm}^{-1}$ . *Data collection and processing*: Bruker KappaApex CCD diffractometer,  $\text{MoK}\alpha$  ( $\lambda = 0.71073 \text{ \AA}$ ), graphite monochromator, MiraCol optics,  $-12 \leq h \leq 14$ ,  $-18 \leq k \leq 17$ ,  $-13 \leq l \leq 13$ , frame scan width =  $0.5^\circ$ , scan speed  $1.0^\circ$  per 60 sec, typical peak mosaicity  $0.79^\circ$ ,  $2\theta_{\text{max}} = 61.22$ , 13260 reflections collected, 3545 independent reflections ( $R_{\text{int}} = 0.023$ ). The data were processed with Bruker Apex-II. *Solution and refinement*: Structure solved by Bruker AutoSolve and refined with Full matrix least-squares refinement based on  $F^2$  with SHELXL-2013.<sup>2</sup> 205 parameters with 0 restraints, final  $R_1 = 0.0325$  (based on  $F^2$ ) for data with  $I > 2\sigma(I)$  and  $R_1 = 0.0424$  on 3544 reflections. Goodness of fit on  $F^2 = 1.032$ , largest electron density peak =  $0.452 \text{ e}\cdot\text{\AA}^{-3}$  and hole =  $-0.229 \text{ e}\cdot\text{\AA}^{-3}$ . CCDC 1062741

**2Br** *Crystal data:*  $\text{C}_{13}\text{H}_6\text{BrF}_4\text{NO} + 0.5\text{H}_2\text{O}$ , colorless prism,  $0.22 \times 0.20 \times 0.14 \text{ mm}^3$ , monoclinic, space group  $\text{C2/c}$ ,  $a = 25.4609(1) \text{ \AA}$ ,  $b = 7.0954(3) \text{ \AA}$ ,  $c = 15.6162(8) \text{ \AA}$ ,  $\alpha = 90^\circ$ ,  $\beta = 117.609(3)^\circ$ ,  $\gamma = 90^\circ$  from 18 degrees of data,  $T = 100(2) \text{ K}$ ,  $V = 2499.91(2) \text{ \AA}^3$ ,  $Z = 8$ ,  $F_w = 357.11$ ,  $D_c = 1.898 \text{ Mg}\cdot\text{m}^{-3}$ ,  $\mu = 3.337 \text{ mm}^{-1}$ . *Data collection and processing:* Bruker KappaApex-II diffractometer,  $\text{MoK}\alpha$  ( $\lambda = 0.71073 \text{ \AA}$ ), graphite monochromator, MiraCol optics,  $-39 \leq h \leq 20$ ,  $-10 \leq k \leq 10$ ,  $-21 \leq l \leq 24$ , frame scan width  $= 0.5^\circ$ , scan speed  $1.0^\circ$  per 20 sec, typical peak mosaicity  $0.69^\circ$ , 33058 reflections collected, 4773 independent reflections ( $R_{\text{int}} = 0.034$ ). The data were processed with Bruker Apex-II. *Solution and refinement:* Structure solved by Bruker AutoSolve and refined with full matrix least-squares refinement based on  $F^2$  with SHELXL-2013.<sup>2</sup> 189 parameters with 0 restraints, final  $R_1 = 0.0241$  (based on  $F^2$ ) for data with  $I > 2\sigma(I)$  and  $R_1 = 0.0296$  on 5773 reflections. Goodness of fit on  $F^2 = 1.043$ , largest electron density peak  $= 1.446 \text{ e}\cdot\text{\AA}^{-3}$  and largest electron density hole  $-0.264 \text{ e}\cdot\text{\AA}^{-3}$ . CCDC 1062742

**2I** *Crystal data:*  $2\text{C}_{13}\text{H}_6\text{F}_4\text{INO} + 3\text{H}_2\text{O}$ , colorless needles,  $0.56 \times 0.15 \times 0.12 \text{ mm}^3$ , monoclinic, space group  $\text{P2}_1/\text{n}$ ,  $a = 16.6858(6) \text{ \AA}$ ,  $b = 4.7557(2) \text{ \AA}$ ,  $c = 17.1322(6) \text{ \AA}$ ,  $\beta = 90.634(2)^\circ$  from 30 degrees of data,  $T = 120(2) \text{ K}$ ,  $V = 1359.40(9) \text{ \AA}^3$ ,  $Z = 2$ ,  $F_w = 844.22$ ,  $D_c = 2.062 \text{ Mg}\cdot\text{m}^{-3}$ ,  $\mu = 2.410 \text{ mm}^{-1}$ . *Data collection and processing:* BrukerApex II KappaCCD diffractometer,  $\text{MoK}\alpha$  ( $\lambda = 0.71073 \text{ \AA}$ ), graphite monochromator,  $-25 \leq h \leq 21$ ,  $-7 \leq k \leq 6$ ,  $-26 \leq l \leq 25$ , frame scan width  $= 0.5^\circ$ , scan speed  $1.0^\circ$  per 40 sec, typical peak mosaicity  $0.68^\circ$ , 15556 reflections collected, 6997 independent reflections ( $R_{\text{int}} = 0.0307$ ). The data were processed with Apex-II. *Solution and refinement:* Structure solved by Bruker AutoSolve and refined with Full matrix least-squares refinement based on  $F^2$  with SHELXL-2013.<sup>2</sup> 209 parameters with 5 restraints, final  $R_1 = 0.0231$  (based on  $F^2$ ) for data with  $I > 2\sigma(I)$  and  $R_1 = 0.0296$  on 5142 reflections. Goodness of fit on  $F^2 = 1.040$ , largest electron density peak  $= 1.612 \text{ e}\cdot\text{\AA}^{-3}$  and hole  $= -0.658 \text{ e}\cdot\text{\AA}^{-3}$ . CCDC 1062740

**Table S1.** Selected intermolecular interaction geometries for **1F-I** and **2F-I**.

| Compound                | Interaction type    | Distance (Å) | Angles (deg) | R <sup>a</sup> |
|-------------------------|---------------------|--------------|--------------|----------------|
| <b>1F</b>               | C(18)–H(18)···N(17) | 2.49(2)      | 150.3(15)    | 0.906          |
|                         | C(19)–H(19)···F(2)  | 2.52(2)      |              |                |
|                         | C(16)–H(16)···F(8)  | 2.66(2)      |              |                |
|                         | $\pi$ – $\pi$       | 3.262        |              |                |
| <b>1Cl</b>              | C(1)–Cl(1)···N(1)   | 2.967(2)     | 177.39(6)    | 0.890          |
|                         | F(3)···F(2)         | 2.859(2)     |              |                |
|                         | C(7)–H···F(2)       | 2.65(2)      |              |                |
|                         | $\pi$ – $\pi$       | 3.508        |              |                |
| <b>1Br<sup>1a</sup></b> | C–Br···N            | 2.841        | 177.76       | 0.831          |
|                         | F···F               | 2.832        |              |                |
|                         | $\pi$ – $\pi$       | 3.357        |              |                |
| <b>1I<sup>1b</sup></b>  | C–I···N             | 2.713        | 177.75       | 0.768          |
|                         | C–H···F             | 2.537        |              |                |
|                         | $\pi$ – $\pi$       | 3.60         |              |                |
| <b>2F</b>               | C(12)–H(12)···O(1)  | 2.264(3)     | 133.0(3)     | 0.832          |
|                         | F(1)···F(2)         | 2.812(2)     |              |                |
|                         | C(10)–H(10)···F(4)  | 2.588(3)     |              |                |
|                         | $\pi$ – $\pi$       | 3.047        |              |                |
| <b>2Cl</b>              | C(12)–H(12)···O(1)  | 2.34 (2)     | 163.1(14)    | 0.860          |
|                         | C(10)–H(10)···O(1)  | 2.49(2)      | 138.2(12)    | 0.915          |
|                         | C(8)–H(8)···F(4)    | 2.44(2)      |              |                |
|                         | F(1)···F(4)         | 2.761(1)     |              |                |
|                         | F(3)···F(4)         | 2.878(1)     |              |                |
|                         | $\pi$ – $\pi$       | 3.318        |              |                |
| <b>2Br</b>              | C(1)–Br(1)···O(1)   | 2.801(1)     | 162.98(4)    | 0.826          |
|                         | C(11)–H(11)···O(1)  | 2.571(4)     | 156.8(1)     | 0.940          |
|                         | C(7)–H(7)···F(2)    | 2.623(1)     |              |                |
|                         | C(10)–H(10)···F(2)  | 2.542(1)     |              |                |
|                         | C(12)–H(12)···F(1)  | 2.435(2)     |              |                |
|                         | F(2)···F(4)         | 2.927(1)     |              |                |
|                         | $\pi$ – $\pi$       | 3.356        |              |                |
| <b>2I</b>               | C(1)–I(1)···O(1)    | 2.785(1)     | 174.44(5)    | 0.790          |
|                         | C(11)–H(11)···F(1)  | 2.561(2)     |              |                |
|                         | F(4)···F(4)         | 2.769(2)     |              |                |
|                         | $\pi$ – $\pi$       | 3.489        |              |                |

<sup>a</sup> R = distance/sum of van der Waals radii for H, 1.20 Å; O, 1.52 Å; N, 1.55 Å; F, 1.47 Å; Cl, 1.75 Å; Br, 1.87 Å; I, 1.98 Å. The relative shortening of the C–X···N bond when going from X = Cl to Br and then I, compared with the sum of vdW radii, was found to be ~11%, 17%, and 23%, respectively. These observations are in agreement with the relative XB donor strength of X (I>Br>Cl), resulting in weaker XB interactions in **1Cl**.<sup>3</sup>

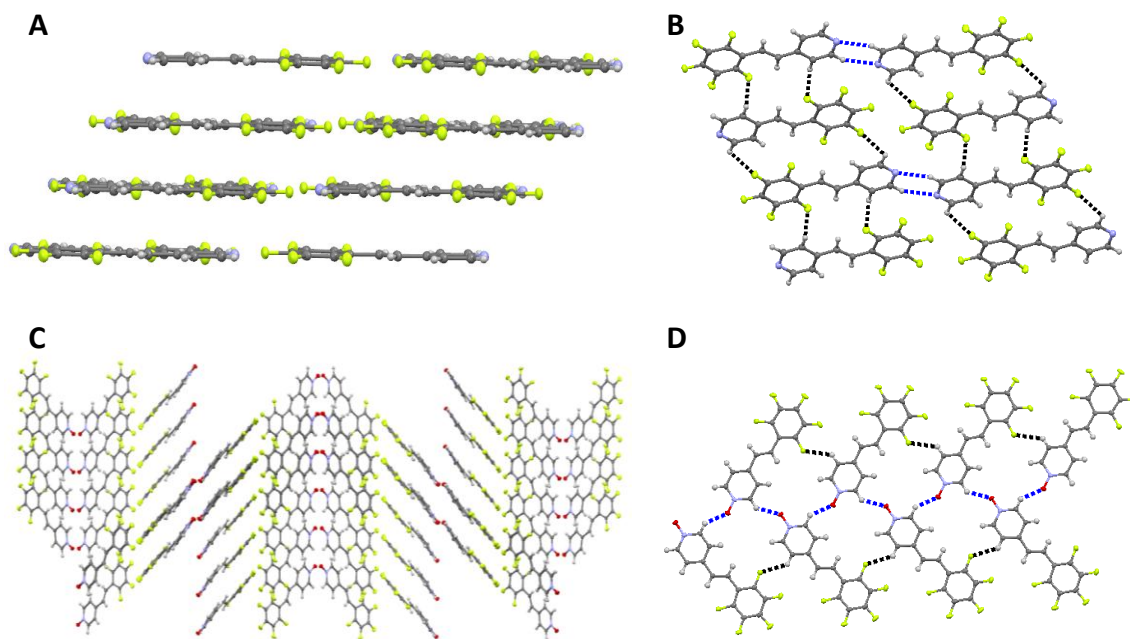

**Figure S1.** Molecular packing of compounds (A,B) **1F** and (C,D) **2F**. The dashed lines in B and D indicate short contacts (blue dashed line: hydrogen bonding; black dashed line: other). Atomic color scheme: carbon, gray; nitrogen, blue; fluorine, yellow; oxygen, red. Water molecules in C and D are omitted for clarity (see Figure S5).

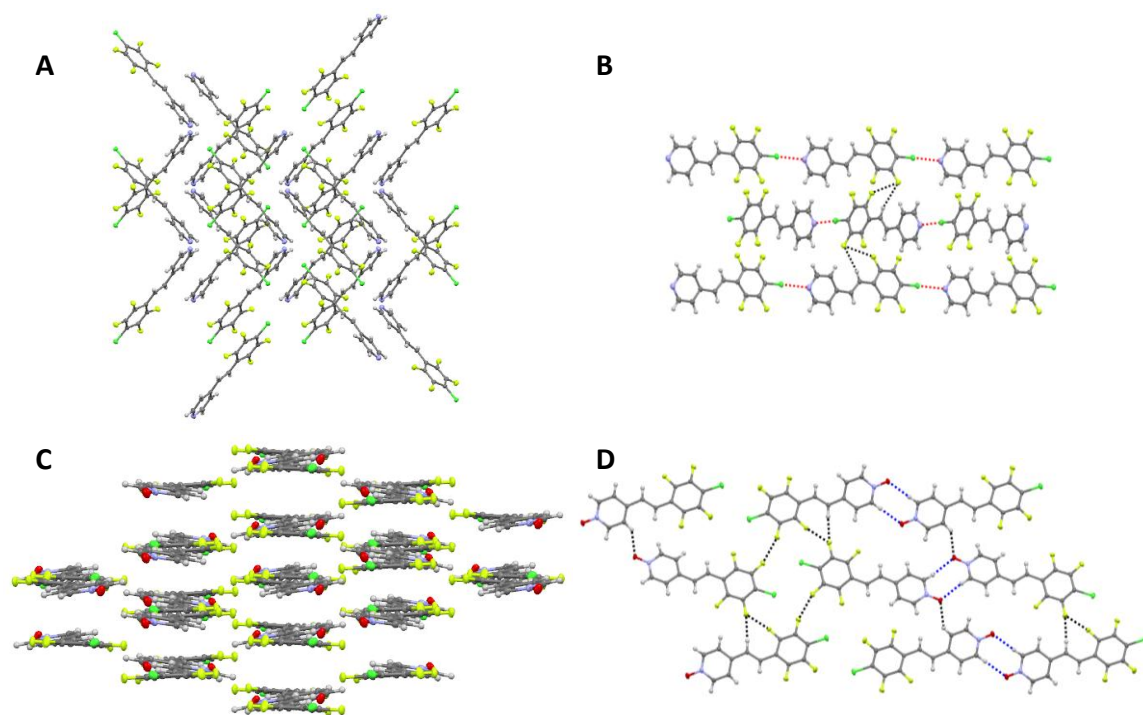

**Figure S2.** Molecular packing of compounds (A,B) **1Cl** and (C,D) **2Cl**. The Cl atom in **2Cl** is not involved in any short contacts as demonstrated in C and D. The dashed lines in B and D indicate short contacts (red dashed line: halogen bonding; blue dashed line: hydrogen bonding; black dashed line: other). Atomic color scheme: carbon, gray; nitrogen, blue; fluorine, yellow; oxygen, red; green, chlorine.

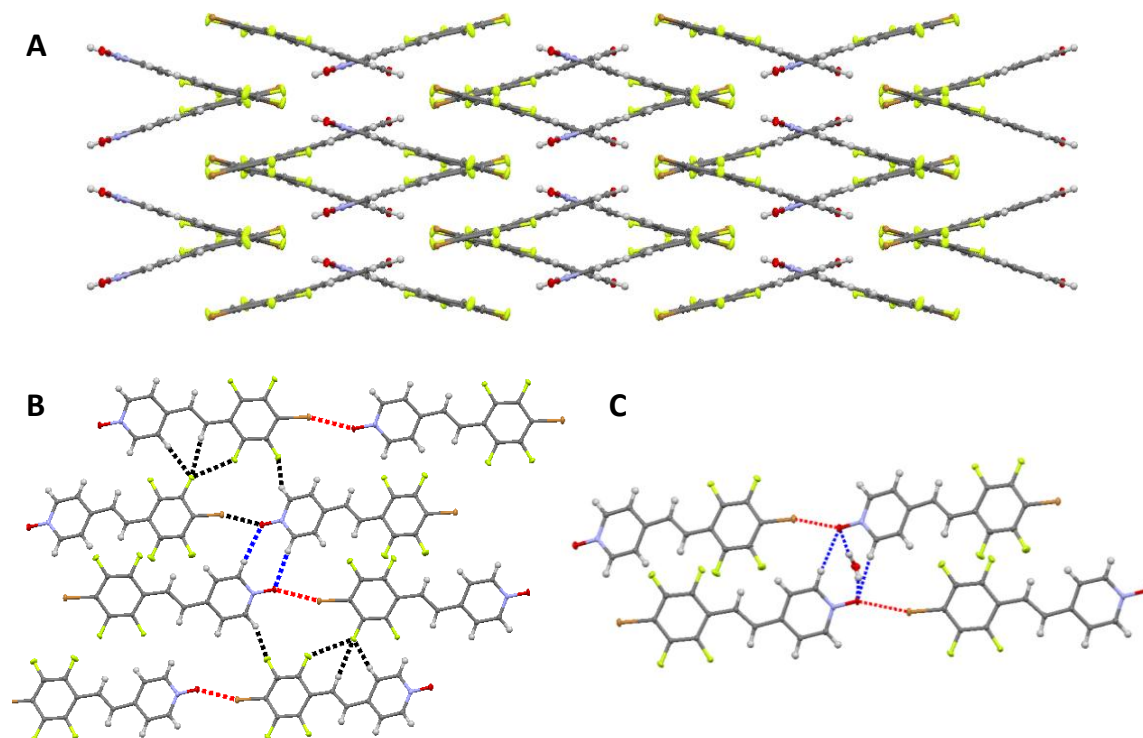

**Figure S3.** Molecular packing of compound **2Br** (A,B) omitting and (C) displaying the water molecules incorporated in the structure. The water molecules trapped in the solid framework of **2Br** do not interfere with the primary C–Br $\cdots$ O $^-$  or C–H $\cdots$ O $^-$  interactions. The dashed lines in B and C indicate short contacts (red dashed line: halogen bonding; blue dashed line: hydrogen bonding; black dashed line: other). Atomic color scheme: carbon, gray; nitrogen, blue; fluorine, yellow; oxygen, red; green; brown, bromine.

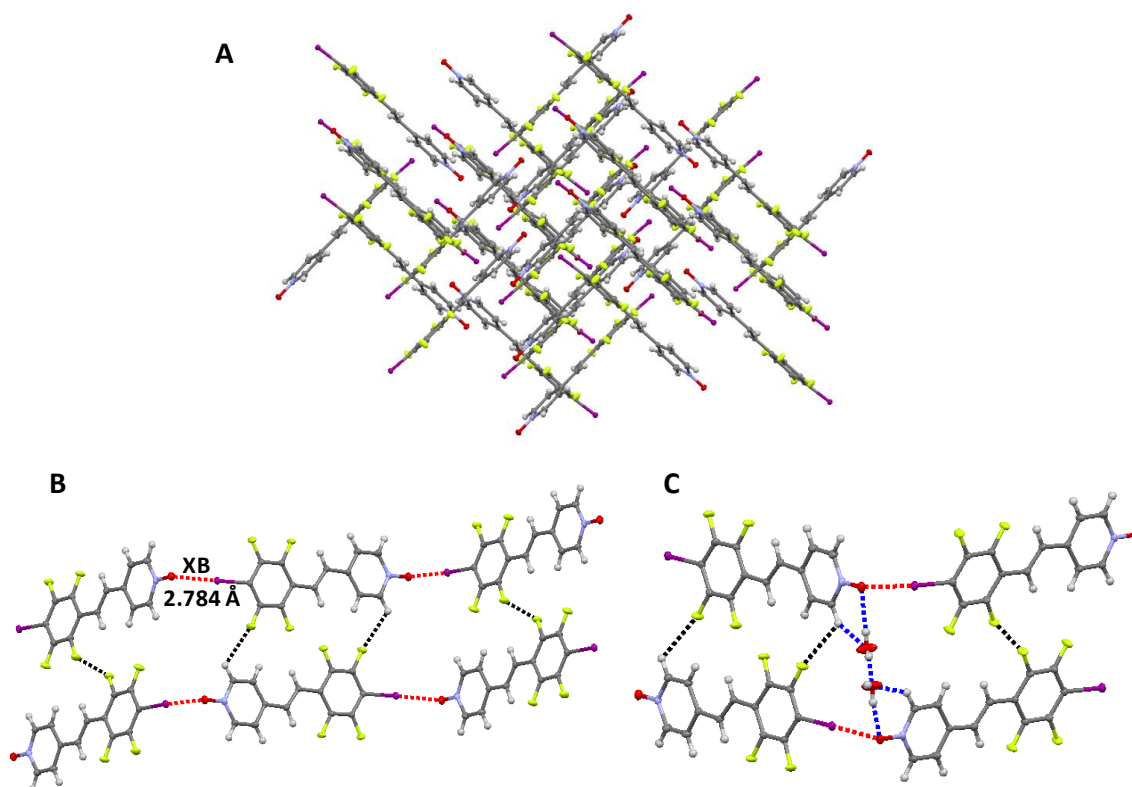

**Figure S4.** Molecular packing of compound **2I** (A,B) omitting and (C) displaying the water molecules incorporated in the structure. Two adjacent pyridine-*N*-oxide moieties are bridged by two water molecules incorporated in the crystal structure, via a network of hydrogen bonds. Apparently, this does not interfere with the formation of the XB-based network. The dashed lines in B and C indicate short contacts (red dashed line: halogen bonding; blue dashed line: hydrogen bonding; black dashed line: other). Atomic color scheme: carbon, gray; nitrogen, blue; fluorine, yellow; oxygen, red; green, purple, iodine.

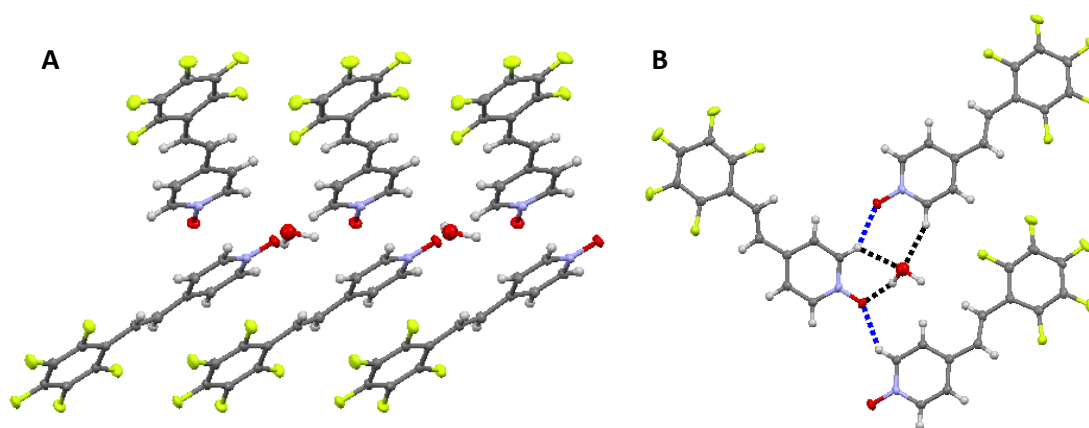

**Figure S5.** (A, B) Molecular packing of compound **2F** displaying the water molecules incorporated in the structure. The dashed lines in B indicate short contacts (blue dashed line: hydrogen bonding; black dashed line: other). Atomic color scheme: carbon, gray; nitrogen, blue; fluorine, yellow; oxygen, red; green.

## References

- (1) a) Lucassen, A. C. B.; Vartanian, M.; Leitus, G.; van der Boom, M. E. *Cryst. Growth Des.* **2005**, *5*, 1671; b) Aakeröy, C. B.; Schultheiss, N.; Desper, J.; Moore, C. *CrystEngComm* **2007**, *9*, 421; c) Shirman, T.; Arad, T.; van der Boom, M. E. *Angew. Chem. Int. Ed.* **2010**, *49*, 926; d) Shirman, T.; Kaminker, R.; Freeman, D.; van der Boom, M. E. *ACS Nano* **2011**, *5*, 6553.
- (2) Sheldrick, G. *Acta. Crystallogr. C* **2015**, *71*, 3.
- (3) Clark, T.; Hennemann, M.; Murray, J.; Politzer, P. *J. Mol. Model.* **2007**, *13*, 291.
